# Supplementary material for: Mild Cognitive Impairment Is Associated with Enhanced Activation of Th17 Lymphocytes in Non-Alcoholic Fatty Liver Disease
Source: MDPI journal article supplement (doi:10.3390/ijms241210407), 2023-06-20
Supplement: s1 [file s1]

## SUPPLEMENTARY INFORMATION

### **Mild cognitive impairment is associated with immunological and inflammatory alterations in non-alcoholic fatty liver disease**

Alessandra Fiorillo, Juan-José Gallego, Franc Casanova-Ferrer, Carla Giménez-Garzó, Amparo Urios, Maria-Pilar Ballester, Lucia Durbán, Maria-Pilar Rios, Javier Megías, Teresa San Miguel, Elena Kosenko, Desamparados Escudero-García, Salvador Benlloch, Vicente Felipo, Carmina Montoliu\*

#### **Contents:**

**Table S1:** Monoclonal antibodies used

**Table S2.** Test performance of controls and patients

**Table S3.** Characteristics of patients grouped by liver damage

**Table S4.** Monocyte and CD4<sup>+</sup> lymphocyte populations in controls and patients grouped by liver damage (NAFL and NASH)

**Table S5.** Plasma cytokine levels in controls and patients

**Table S6.** Plasma cytokine levels of NAFL and NASH patients.

**Figure S1.** Monocyte populations in peripheral blood from NAFLD patients and controls.

**Figure S2.** Receiver operating characteristic (ROC) curves for sensitivity and specificity of IL-13, and activated autoreactive cells (%CD69<sup>+</sup>) in the diagnosis of mild cognitive impairment in NAFLD patients.

**Table S1. Monoclonal antibodies used**

| <b>Antibodies</b> | <b>Fluorochrome</b>                                   | <b>Clone</b> | <b>Company</b>  |
|-------------------|-------------------------------------------------------|--------------|-----------------|
| <b>CD45</b>       | KO (Krome Orange)                                     | J33          | Beckman Coulter |
| <b>CD14</b>       | PB (Pacific Blue)                                     | M5E2         | Biolegend       |
| <b>CD16</b>       | APC (Allophycocyanin) -Alexa Fluor* 750               | 3G8          | Beckman Coulter |
| <b>CD3</b>        | APC (Allophycocyanin)                                 | UCHT1        | Biolegend       |
| <b>CD4</b>        | ECD (Electron Coupled Dye)                            | SFCI12T4     | Beckman Coulter |
| <b>CD45RA</b>     | PERCP/Cy5.5 (Peridinin Chlorophyll Protein/Cyanin5.5) | D11          | Biolegend       |
| <b>CD45RO</b>     | APC/Cy7 (Allophycocyanin/Cyanin7)                     | HI100        | Biolegend       |
| <b>CD28</b>       | PB (Pacific Blue)                                     | UCHL1        | Biolegend       |
| <b>CXCR5</b>      | Alexa Fluor® 700                                      | J252D4       | Biolegend       |
| <b>CXCR3</b>      | Vio® Bright FITC                                      | REA232       | Miltenyi Biotec |
| <b>CCR4</b>       | PE-Vio® 770                                           | REA279       | Miltenyi Biotec |
| <b>CCR6</b>       | Brilliant Violet 510                                  | G034E3       | Biolegend       |
| <b>CCR10</b>      | PE                                                    | REA326       | Miltenyi Biotec |
| <b>CD25</b>       | Brilliant Violet 510                                  | PC61         | Biolegend       |
| <b>FoxP3</b>      | Alexa Fluor® 488                                      | 259D/C7      | BD Pharmingen   |
| <b>CD69</b>       | Alexa Fluor® 488                                      | FN50         | Biolegend       |

**Table S2. Test performance of controls and patients**

| TEST<br>/parameter                                           | CONTROLS<br>(n=31) | NAFLD patients<br>without MCI<br>(n=51) | NAFLD patients<br>with MCI<br>(n=20) | Global<br><i>p</i> Value |
|--------------------------------------------------------------|--------------------|-----------------------------------------|--------------------------------------|--------------------------|
| <b>Coordination tests</b>                                    |                    |                                         |                                      |                          |
| <b>Bimanual (min)</b>                                        | 1.93 ± 0.05        | 2.03 ± 0.04                             | 2.42 ± 0.09****/bbbb                 | <b>&lt;0.0001</b>        |
| <b>Visuo-motor<br/>(min)</b>                                 | 2.27 ± 0.05        | 2.26 ± 0.05                             | 2.72 ± 0.11***/bbbb                  | <b>&lt;0.0001</b>        |
| <b>d2 Test</b>                                               |                    |                                         |                                      |                          |
| <b>TR Values</b>                                             | 435 ± 10           | 420 ± 12                                | 272 ± 20****/bbbb                    | <b>&lt;0.0001</b>        |
| <b>TA Values</b>                                             | 173 ± 4            | 159 ± 4                                 | 101 ± 8****/bbbb                     | <b>&lt;0.0001</b>        |
| <b>O Values</b>                                              | 9 ± 1              | 14 ± 1                                  | 15 ± 4                               | 0.0942                   |
| <b>C Values</b>                                              | 1 ± 0.3            | 1 ± 0.2                                 | 5 ± 1.2****/bbb                      | <b>&lt;0.0001</b>        |
| <b>O+C Values</b>                                            | 10 ± 1             | 14 ± 1                                  | 19 ± 4*                              | <b>0.0155</b>            |
| <b>TOT Values</b>                                            | 425 ± 10           | 4402 ± 10                               | 253 ± 19****/bbbb                    | <b>&lt;0.0001</b>        |
| <b>CON Values</b>                                            | 169 ± 5            | 157 ± 5                                 | 92 ± 7****/bbbb                      | <b>&lt;0.0001</b>        |
| <b>Stroop Test</b>                                           |                    |                                         |                                      |                          |
| <b>Congruent Task<br/>(Number of<br/>words)</b>              | 115 ± 3            | 111 ± 2                                 | 90 ± 3****/bbbb                      | <b>&lt;0.0001</b>        |
| <b>Neutral Task<br/>(Number of<br/>colours)</b>              | 86 ± 3             | 84 ± 2                                  | 69 ± 3***/bbb                        | <b>0.0002</b>            |
| <b>Incongruent<br/>Task (Number<br/>of items)</b>            | 49 ± 2             | 46 ± 1                                  | 38 ± 2***/bb                         | <b>0.0004</b>            |
| <b>Oral SDMT test</b>                                        |                    |                                         |                                      |                          |
| <b>Total items</b>                                           | 55 ± 1             | 53 ± 1                                  | 38 ± 2****/bbbb                      | <b>&lt;0.0001</b>        |
| <b>Correct pairings</b>                                      | 54 ± 1             | 52 ± 1                                  | 36 ± 2****/bbbb                      | <b>&lt;0.0001</b>        |
| <b>Errors</b>                                                | 0.5 ± 0.1          | 0.8 ± 0.2                               | 1.7 ± 0.5*                           | <b>0.0404</b>            |
| <b>DIGIT SPAN Test</b>                                       |                    |                                         |                                      |                          |
| <b>Digits forward<br/>(right answers)</b>                    | 9 ± 0.4            | 9 ± 0.3                                 | 8 ± 0.5*                             | <b>0.0358</b>            |
| <b>Digits backward<br/>(right answers)</b>                   | 7 ± 0.4            | 6 ± 0.3*                                | 4 ± 0.4***/b                         | <b>0.0002</b>            |
| <b>Number-letter<br/>sequencing Test<br/>(right answers)</b> | 10 ± 0.4           | 9 ± 0.5                                 | 7 ± 0.6***/b                         | <b>0.0004</b>            |

Values are expressed as mean ± SEM (standard error of mean). Results were analyzed with one-way ANOVA followed by post-hoc Tukey's multiple comparisons test. MCI, mild cognitive impairment;

NAFL: non-alcoholic fatty liver; NASH; Oral SDMT, Symbol digit modalities test (oral version). D2 test parameters: TR, Total number of characters processed; TOT, Total correctly processed; CON, Concentration performance; RA, Total right answers; O, errors of omission; C, errors of commission; O+C, Total errors. Values significantly different from controls are indicated by asterisks\*. Values significantly different in patients with MCI compared to patients without MCI are indicated by b. (\*<sup>/b</sup>  $p < 0.05$ ; <sup>bb</sup>  $p < 0.01$ ; <sup>\*\*\*/bbb</sup>  $p < 0.001$ ; <sup>\*\*\*\*/bbbb</sup>  $p < 0.0001$ ).

**Table S3. Characteristics of patients grouped by liver damage**

| Parameter                                   | NAFL patients | NASH patients | p value      |
|---------------------------------------------|---------------|---------------|--------------|
| Number of subjects [n (%)]                  | 39 (55)       | 32 (45)       |              |
| Age <sup>a</sup>                            | 58±1.4        | 59±1.4        | 0.628        |
| Sex [n (%)]                                 |               |               | 0.115        |
| - Male                                      | 22 (56)       | 12 (38)       |              |
| - Female                                    | 17 (44)       | 20 (62)       |              |
| Education <sup>a</sup> (years of schooling) | 15±0.7        | 12±0.7        | <b>0.010</b> |
| Comorbidity [n (%)]                         |               |               |              |
| - Diabetes mellitus                         | 14 (36)       | 16 (50)       | 0.235        |
| - Dyslipidemia                              | 24 (62)       | 18 (56)       | 0.654        |
| - Arterial Hypertension                     | 18 (46)       | 20 (63)       | 0.172        |
| - Metabolic Syndrome                        | 15 (39)       | 18 (56)       | 0.138        |
| Laboratory Parameters <sup>a</sup>          |               |               |              |
| - AST (U/mL)                                | 33.3±2.6      | 39.6±3.1      | 0.120        |
| - ALT (U/mL)                                | 42.1±3.7      | 49.9±4.5      | 0.185        |
| - Albumin (g/dL)                            | 4.4±0.0       | 4.3±0.1       | <b>0.045</b> |
| - Bilirubin (mg/dL)                         | 0.7±0.1       | 0.7±0.1       | 0.559        |
| - Creatinine (mg/dL)                        | 0.8±0.0       | 0.8 ±0.0      | 0.183        |
| - Platelets (x10 <sup>9</sup> /L)           | 249.1±14.9    | 240.6±14.8    | 0.687        |
| - INR                                       | 1.1±0.1       | 1.01±0.1      | 0.335        |
| - Ammonia (μM)                              | 16.3±2.2      | 15.2 ±(1.3    | 0.677        |
| BMI <sup>a</sup>                            | 30±0.7        | 34.2±1.0      | <0.0001      |
| Diagnosis [n (%)]                           |               |               |              |
| - Biopsy (NAS)                              | 19 (49)       | 29 (91)       |              |
| - Fibroscan (FAST)                          | 20 (51)       | 3 (9)         |              |
| Fibroscan Parameters <sup>a</sup>           |               |               |              |
| - LSM (kPa)                                 | 6.9±0.5       | 9.9±1.0       | <b>0.006</b> |
| - CAP (dB/M)                                | 320.8±10.2    | 326.4±9.3     | 0.691        |
| Fibrosis grade [n (%)]                      |               |               | <b>0.023</b> |
| - F0                                        | 6 (30)        | 3 (11)        |              |
| - F1                                        | 5 (50)        | 5 (18)        |              |
| - F2                                        | 8 (40)        | 13 (46)       |              |
| - F3                                        | 1 (5)         | 7 (25)        |              |
| MCI [n (%)]                                 | 12 (31)       | 8 (25)        | 0.593        |
| MCI Score <sup>a</sup>                      | -2.2± 0.7     | -3.5±0.05     | 0.041        |

<sup>a</sup>Data are shown as mean ± SEM (standard error of mean). Between-group comparisons were analyzed by t-student for continuous data and Chi-Square ( $\chi^2$ ) for categorical data. Abbreviations: AST, aspartate aminotransferase; ALT, alanine aminotransferase; BMI, body mass index; CAP, controlled attenuation parameter; FAST, fibroscan-AST score; INR, international normalized ratio; LSM, liver stiffness measurement; NAFL, non-alcoholic fatty liver; NAS, NAFLD activity score; NASH, non-alcoholic steatohepatitis; MCI, mild cognitive impairment.

**Table S4. Monocyte and CD4<sup>+</sup> lymphocyte populations of controls and patients grouped by liver damage (NAFL and NASH)**

|                                                          | Control     | NAFL patients    | NASH patients    | Global<br><i>p</i> value |
|----------------------------------------------------------|-------------|------------------|------------------|--------------------------|
| <b>Monocytes</b>                                         |             |                  |                  |                          |
| <b>CD14<sup>++</sup>CD16<sup>-</sup> (Classical)</b>     | 95.2 ± 0.3  | 93.4 ± 0.5       | 93.0 ± 0.7*      | 0.022                    |
| <b>CD14<sup>+</sup>CD16<sup>+</sup> (Intermediate)</b>   | 2.4 ± 0.2   | 6.4 ± 0.5*****   | 7.3 ± 0.6*****   | < 0.0001                 |
| <b>CD14<sup>+</sup>CD16<sup>++</sup> (Non-classical)</b> | 0.7 ± 0.1   | 0.1 ± 0.0*****   | 0.1 ± 0.0*****   | < 0.0001                 |
| <b>T helper lymphocytes</b>                              |             |                  |                  |                          |
| <b>CD4<sup>+</sup></b>                                   | 61.9 ± 1.9  | 62.2 ± 2.6       | 65.5 ± 2.7       | 0.569                    |
| <b>CD4<sup>+</sup> naïve</b>                             | 27.5 ± 2.4  | 36.7 ± 3.3       | 34.3 ± 3.6       | 0.063                    |
| <b>CD4<sup>+</sup> memory</b>                            | 68.1 ± 2.7  | 69.5 ± 2.3       | 73.6 ± 3.6       | 0.415                    |
| <b>CD4<sup>+</sup> CD28<sup>-</sup></b>                  | 11.2 ± 1.5  | 6.0 ± 1.0**      | 5.5 ± 1.0**      | 0.002                    |
| <b>CD4<sup>+</sup> CD28<sup>+</sup></b>                  | 89.0 ± 1.5  | 95.5 ± 0.9***    | 94.9 ± 1.3**     | 0.0004                   |
| <b>Activation</b>                                        |             |                  |                  |                          |
| <b>CD4<sup>+</sup></b>                                   | 0.33 ± 0.03 | 6.04 ± 0.80***** | 5.15 ± 0.90***** | < 0.0001                 |
| <b>CD4<sup>+</sup> naïve</b>                             | 0.3 ± 0.1   | 2.8 ± 0.4*****   | 2.8 ± 0.6*****   | < 0.0001                 |
| <b>CD4<sup>+</sup> memory</b>                            | 0.6 ± 0.1   | 8.8 ± 1.1*****   | 7.3 ± 1.1*****   | < 0.0001                 |
| <b>CD4<sup>+</sup> CD28<sup>-</sup></b>                  | 0.3 ± 0.1   | 8.1 ± 1.2*****   | 8.4 ± 1.9*****   | < 0.0001                 |
| <b>CD4<sup>+</sup> CD28<sup>+</sup></b>                  | 2.5 ± 0.1   | 6.3 ± 0.8***     | 5.3 ± 1.0*       | 0.001                    |

Values are expressed as mean ± SEM (standard error of mean). Results were analyzed with one-way ANOVA followed by post-hoc Tukey's multiple comparisons test. NAFL: non-alcoholic fatty liver; NASH; non-alcoholic steatohepatitis. Values significantly different from controls are indicated by asterisks (\*): \*  $p < 0.05$ ; \*\*  $p < 0.01$ ; \*\*\*  $p < 0.001$ ; \*\*\*\*\*  $p < 0.0001$ ). Activation is expressed as the percentage of cells expressing CD69 marker.

**Table S5. Plasma cytokine levels in controls and patients**

| <b>Cytokine concentration (pg/mL)</b> | <b>Control</b> | <b>NMCI patients</b> | <b>MCI patients</b> | <b>Global <i>p</i> value</b> |
|---------------------------------------|----------------|----------------------|---------------------|------------------------------|
| <b>IL-13</b>                          | 3.6 ± 0.5      | 4.0 ± 0.4            | 11.1 ± 2.0****/bbbb | <0.0001                      |
| <b>IL-17A</b>                         | 0.2 ± 0.01     | 0.2 ± 0.02           | 0.3 ± 0.003***/bb   | 0.0007                       |
| <b>IFN <math>\gamma</math></b>        | 0.22 ± 0.02    | 0.27 ± 0.03          | 0.62 ± 0.24*/b      | 0.0114                       |
| <b>IL-6</b>                           | 1.6 ± 0.1      | 2.8 ± 0.2*           | 4.1 ± 0.8****/b     | <0.0001                      |
| <b>IL-18</b>                          | 144.9 ± 12.1   | 190.8 ± 11.7         | 258.7 ± 32.2        | 0.0002                       |
| <b>IL-10</b>                          | 3.3 ± 0.2      | 5.4 ± 0.3****        | 5.7 ± 0.7***        | <0.0001                      |
| <b>IL-22</b>                          | 200.0 ± 18.8   | 276.9 ± 27.0         | 418.5 ± 64.5***/b   | 0.0014                       |
| <b>TGF <math>\beta</math></b>         | 4759 ± 243.3   | 8.38 ± 416.0****     | 8351 ± 832.4****    | <0.0001                      |
| <b>IL-8</b>                           | 7.3 ± 1.3      | 18.4 ± 1.6****       | 15.3 ± 2.1*         | <0.0001                      |
| <b>IL-15</b>                          | 4.7 ± 1.0      | 6.1 ± 0.9            | 5.2 ± 1.1           | 0.5753                       |
| <b>IL-23</b>                          | 11.5 ± 2.9     | 14.9 ± 2.6           | 34.2 ± 8.5***/bb    | 0.0026                       |
| <b>IL-12 p70</b>                      | 0.17 ± 0.00    | 0.19 ± 0.02          | 0.14 ± 0.01         | 0.2364                       |
| <b>TNF <math>\alpha</math></b>        | 5.4 ± 0.2      | 6.5 ± 0.4            | 6.5 ± 0.9           | 0.1186                       |
| <b>IL-4</b>                           | 65.0 ± 2.3     | 65.0 ± 2.1           | 68.4 ± 2.1          | 0.5108                       |
| <b>IL-21</b>                          | 8.2 ± 2.3      | 31.0 ± 4.3*          | 62.4 ± 19.6***/b    | 0.0006                       |
| <b>IL-1 <math>\beta</math></b>        | 2.2 ± 0.4      | 3.7 ± 0.5            | 4.9 ± 1.0**         | 0,0104                       |
| <b>CCL5</b>                           | 7352 ± 830.5   | 10605 ± 847.6*       | 11625 ± 1539*       | 0.0226                       |
| <b>CX3CL1</b>                         | 489.2 ± 121.9  | 799.4 ± 116.8        | 516.6 ± 141.3       | 0.0154                       |
| <b>CCL20</b>                          | 8.2 ± 1.6      | 12.0 ± 1.8           | 17.9 ± 4.5*         | 0.1686                       |
| <b>CCL2</b>                           | 5.1 ± 0.8      | 11.5 ± 0.8****       | 12.7 ± 1.5****      | 0.0369                       |
| <b>BDNF</b>                           | 1942 ± 159.4   | 1994 ± 143.5         | 2624 ± 165.7        | <0.0001                      |

Values are expressed as mean ± SEM (standard error of mean). Results were analyzed with one-way ANOVA followed by post-hoc Tukey's multiple comparisons test. MCI, mild cognitive impairment. Values significantly different from controls are indicated by asterisks\*. Values significantly different in patients with MCI compared to patients without MCI (NMCI) are indicated by <sup>b</sup>. (\*<sup>b</sup>  $p < 0.05$ ; \*\*<sup>bb</sup>  $p < 0.01$ ; \*\*\*  $p < 0.001$ ; \*\*\*\*/bbbb  $p < 0.0001$ ).

**Table S6. Plasma cytokine levels of NAFL and NASH patients**

| <b>Cytokine concentration (pg/mL)</b> | <b>Control</b> | <b>NAFL patients</b> | <b>NASH patients</b>     | <b>Global <i>p</i> value</b> |
|---------------------------------------|----------------|----------------------|--------------------------|------------------------------|
| <b>IL-13</b>                          | 3.6 ± 0.5      | 6.2 ± 1.0            | 6.1 ± 1.2                | 0.166                        |
| <b>IL17A</b>                          | 0.18 ± 0.02    | 0.21 ± 0.02          | 0.20 ± 0.02              | 0.599                        |
| <b>IFN <math>\gamma</math></b>        | 0.18 ± 0.2     | 0.37 ± 0.13          | 0.39 ± 0.10              | 0.216                        |
| <b>IL-6</b>                           | 1.6 ± 0.1      | 2.9 ± 0.4*           | 3.6 ± 0.4***             | 0.0005                       |
| <b>IL-18</b>                          | 145 ± 12       | 219 ± 21**           | 202 ± 14                 | 0.006                        |
| <b>IL-10</b>                          | 3.3 ± 0.2      | 5.1 ± 0.3***         | 6.0 ± 0.6***             | <0.0001                      |
| <b>IL-22</b>                          | 200 ± 19       | 313 ± 41             | 353 ± 44*                | 0.031                        |
| <b>TGF <math>\beta</math></b>         | 4759 ± 243     | 8265 ± 464****       | 7920 ± 648****           | <0.0001                      |
| <b>IL-8</b>                           | 7.3 ± 1.3      | 18.03 ± 1.8***       | 16.7 ± 1.9**             | <0.0001                      |
| <b>IL-15</b>                          | 4.7 ± 1.0      | 5.9 ± 1.3            | 5.9 ± 1.0                | 0.665                        |
| <b>IL-23</b>                          | 11.5 ± 2.9     | 21.9 ± 4.9           | 18.2 ± 4.1               | 0.241                        |
| <b>IL-12p70</b>                       | 0.17 ± 0.00    | 0.17 ± 0.02          | 0.18 ± 0.02              | 0.983                        |
| <b>TNF alfa</b>                       | 5.4 ± 0.2      | 5.8 ± 0.3            | 7.5 ± 0.8** <sup>b</sup> | 0.003                        |
| <b>IL-4</b>                           | 65.0 ± 2.3     | 67.8 ± 2.1           | 63.1 ± 2.4               | 0.389                        |
| <b>IL-21</b>                          | 8.2 ± 2.3      | 36.3 ± 9.5*          | 36.5 ± 5.6*              | 0.02                         |
| <b>IL-1 beta</b>                      | 2.2 ± 0.4      | 4.2 ± 0.7 *          | 3.6 ± 0.5                | 0.03                         |
| <b>CCL5</b>                           | 7352 ± 830.5   | 11475 ± 1006**       | 10136 ± 1111             | 0.012                        |
| <b>CX3CL1</b>                         | 489 ± 122      | 547 ± 83             | 937 ± 173                | 0.039                        |
| <b>CCL20</b>                          | 8.2 ± 1.6      | 14.6 ± 3.0           | 13.0 ± 2.2               | 0.131                        |
| <b>CCL2</b>                           | 5.1 ± 0.8      | 11.7 ± 1.0****       | 12.0 ± 0.9****           | <0.0001                      |
| <b>BDNF</b>                           | 1942 ± 159     | 2399 ± 135           | 1783 ± 205 <sup>b</sup>  | 0.025                        |

Values are expressed as mean ± SEM (standard error of mean). Results were analyzed with one-way ANOVA followed by post-hoc Tukey's multiple comparisons test. NAFL: non-alcoholic fatty liver; NASH, non-alcoholic steatohepatitis. Values significantly different from controls are indicated by asterisks\*. Values significantly different between NASH and NAFL patients are indicated by <sup>b</sup>. (\*<sup>b</sup>  $p < 0.05$ ; \*\*  $p < 0.01$ ; \*\*\*  $p < 0.001$ ; \*\*\*\*  $p < 0.0001$ ).



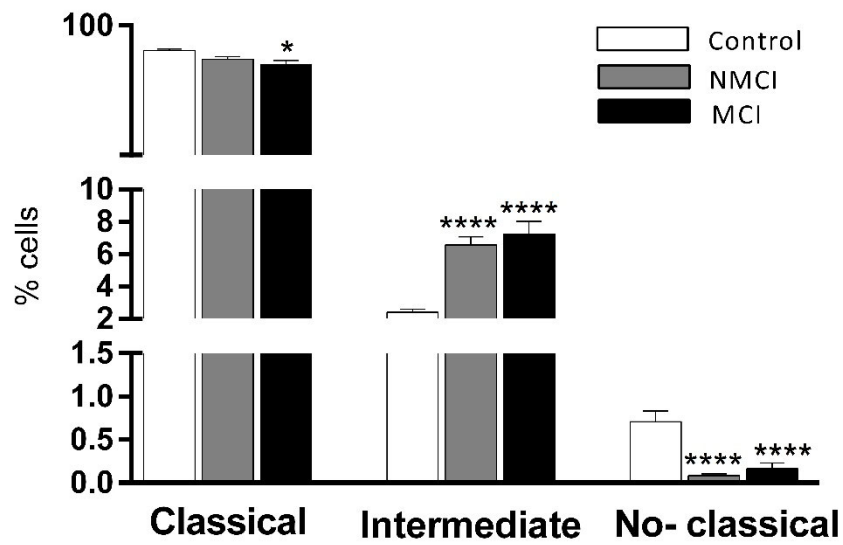

**Figure S1. Monocyte populations in peripheral blood from NAFLD patients and controls.** Percentage of the three monocyte subsets relative to total monocyte cells: classical ( $CD14^{++}CD16^{-}$ ), intermediate ( $CD14^{++}CD16^{+}$ ) and non-classical ( $CD14^{+}CD16^{++}$ ). Values are mean  $\pm$  SEM of the following groups: control, n=15; patients without MCI (NMCI), n=26; patients with MCI (MCI), n=12. Values significantly different from controls are indicated by asterisks\*. (\* $p<0.05$ ; \*\*\*\* $p<0.0001$ ). MCI, mild cognitive impairment.

**ROC curve of IL-13**

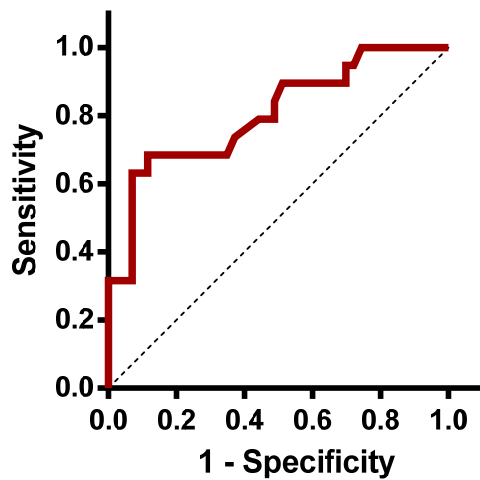

**ROC curve of CD4<sup>+</sup> CD28<sup>-</sup> CD69<sup>+</sup> cells**

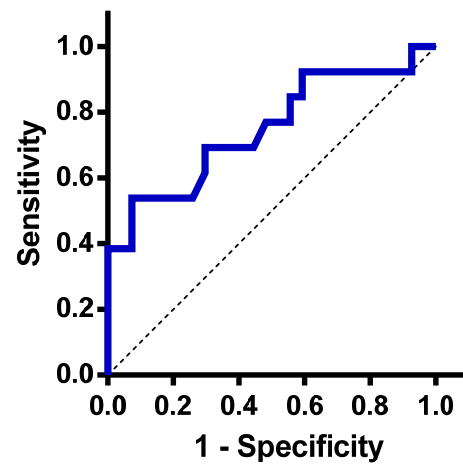

**Figure S2. Receiver operating characteristic (ROC) curves for sensitivity and specificity of IL-13 and activated autoreactive cells (%CD69<sup>+</sup>) in the diagnosis of mild cognitive impairment in NAFLD patients.** Area under the curves (AUC) were: IL-13: AUC: 0.804 (95% confidence interval (CI) 0.680-0.928;  $P=0.0001$ ); Activated autoreactive cells: AUC: 0.75 (95% CI 0.575-0.924;  $P=0.01$ ). For IL13, the specificity was 83% and the sensitivity was 68% at a cutoff of 6.98 pg/mL. For activated autoreactive cells, the specificity was 70% and the sensitivity was 69% at a cutoff of 7.86 %.
